# Supplementary material
Source: PubMed Central journal article supplement (PMC7269480)
Supplement: AAC.02222-19-s0001.pdf [file AAC.02222-19-s0001.pdf]

## Supplementary text

### Supplementary materials and methods

#### Bacterial culture

Bacterial strains were grown in tryptic soy broth. For nafcillin challenge, the strains were grown in the presence of 0.25µg/ml nafcillin for 4h and then plated on tryptic soy agar (TSA) plates (antibiotics added as per requirement) and incubated at 37C for CFUs.

#### List of Strains

| Strains                                       | Description                                                                   | Reference  |
|-----------------------------------------------|-------------------------------------------------------------------------------|------------|
| SF8300ex                                      | Derivative of SF8300 lacking <i>mezA</i> and <i>blaZ</i>                      | (1)        |
| $\Delta$ <i>stk1</i>                          | SF8300ex lacking <i>stk1</i>                                                  | This study |
| $\Delta$ <i>stp1</i>                          | SF8300ex lacking <i>stp1</i>                                                  | This study |
| $\Delta$ <i>stp1</i> +E                       | $\Delta$ <i>stp1</i> containing pTX $\Delta$ vector                           | This study |
| $\Delta$ <i>stp1</i> +wt                      | $\Delta$ <i>stp1</i> expressing wt <i>stp1</i>                                | This study |
| $\Delta$ <i>stp1</i> +SRB                     | $\Delta$ <i>stp1</i> expressing SRB <i>stp1</i> (G169S)                       | This study |
| $\Delta$ <i>stp1</i> +SRT                     | $\Delta$ <i>stp1</i> expressing SRT <i>stp1</i> (Q31X)                        | This study |
| SF8300ex [E]                                  | SF8300ex with empty pAmilux vector                                            | This study |
| SF8300ex [ <i>P</i> <i>pbp4</i> ]             | SF8300ex with pAmilux containing <i>pbp4</i> promoter of SF8300ex             | This study |
| $\Delta$ <i>stk1</i> [E]                      | $\Delta$ <i>stk1</i> with empty pAmilux vector                                | This study |
| $\Delta$ <i>stk1</i> [ <i>P</i> <i>pbp4</i> ] | $\Delta$ <i>stk1</i> with pAmilux containing <i>pbp4</i> promoter of SF8300ex | This study |
| $\Delta$ <i>stp1</i> [E]                      | $\Delta$ <i>stp1</i> with empty pAmilux vector                                | This study |
| $\Delta$ <i>stp1</i> [ <i>P</i> <i>pbp4</i> ] | $\Delta$ <i>stp1</i> with pAmilux containing <i>pbp4</i> promoter of SF8300ex | This study |

#### List of Primers

| Primer       | Sequence                                                        | Description                         |
|--------------|-----------------------------------------------------------------|-------------------------------------|
| Stp1-for     | AAAGGATCCACAAGTAGAAACGAGGTAAGACAAATGC                           | <i>stp1</i> cloning in pTX $\Delta$ |
| Stp1-rev     | ATTACGCGTATCATACTTTATCACCTTCAATAGCCGC                           | <i>stp1</i> cloning in pTX $\Delta$ |
| stp1-stk1-P1 | ACAAGAGCTCCAAAAATTCGAGCGAAACAGATTTTTGAATGG                      | <i>stp1</i> & <i>stk1</i> deletion  |
| stp1-P2      | TTTATTATTTTACCTATCATTGTCTTTACCTCGTTTCTACTTGTGCGTTCCTTTGC        | <i>stp1</i> deletion                |
| stp1-P3      | ATGATAGGTAATAATAAATGAACGATATAAAATTGTAGATAAGC                    | <i>stp1</i> deletion                |
| stp1-P4      | TACACCCCGGGTCTGGCTTTTGGAAATGCTGATGATGAGCAGGCC                   | <i>stp1</i> deletion                |
| stk1-P2      | TACATTTACTTCAATTATATTCATACTTTATCACCTTCAATAGCCGCGAGTATGAAAGTAACG | <i>stk1</i> deletion                |
| stk1-P3      | ATATAATTGAAGTAAATGTACCGAGGTTTCTATTTGGAAGTC                      | <i>stk1</i> deletion                |
| stk1-P4      | TATTCGCGGTATCTCTAATTGATGCTTAACATTACAATTAGG                      | <i>stk1</i> deletion                |

#### List of plasmids

| Plasmid                         | Description                                                                | Reference  |
|---------------------------------|----------------------------------------------------------------------------|------------|
| pTX $\Delta$                    | Used as vector control                                                     | (1)        |
| pTX $\Delta$ + <i>stp1</i> _wt  | Used to constitutively express wt <i>stp1</i>                              | This study |
| pTX $\Delta$ + <i>stp1</i> _SRB | Used to constitutively express SRB <i>stp1</i>                             | This study |
| pTX $\Delta$ + <i>stp1</i> _SRT | Used to constitutively express SRT <i>stp1</i>                             | This study |
| pJB38                           | Used for creation of $\Delta$ <i>stk1</i> and $\Delta$ <i>stp1</i> mutants | (2)        |
| pAmilux                         | Used as vector control for reporter assay                                  | (1)        |
| pAmilux+ <i>P</i> <i>pbp4</i>   | Used for reporter assay for <i>pbp4</i> promoter                           | (1)        |

Fig S1

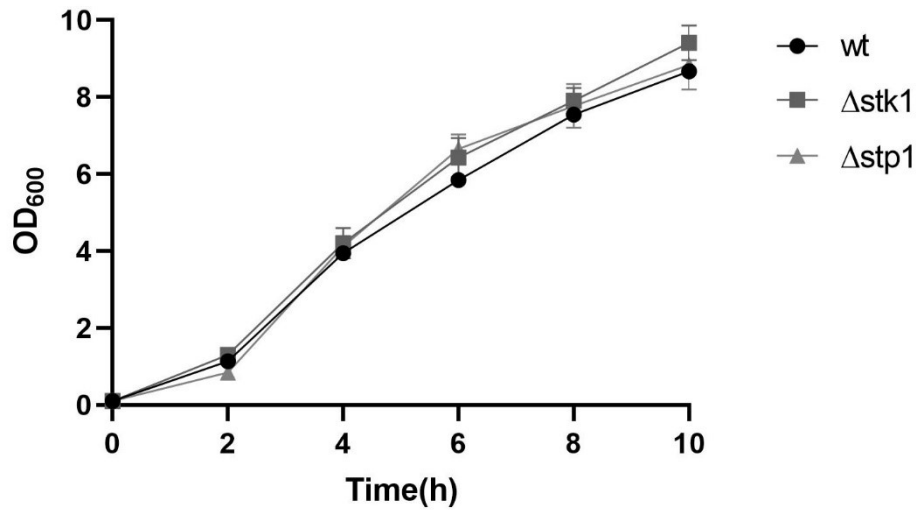

Fig. S1. Growth profiles of SF8300ex (wt),  $\Delta stk1$  and  $\Delta stp1$  in TSB. Experiments were repeated at least twice.

Fig. S2

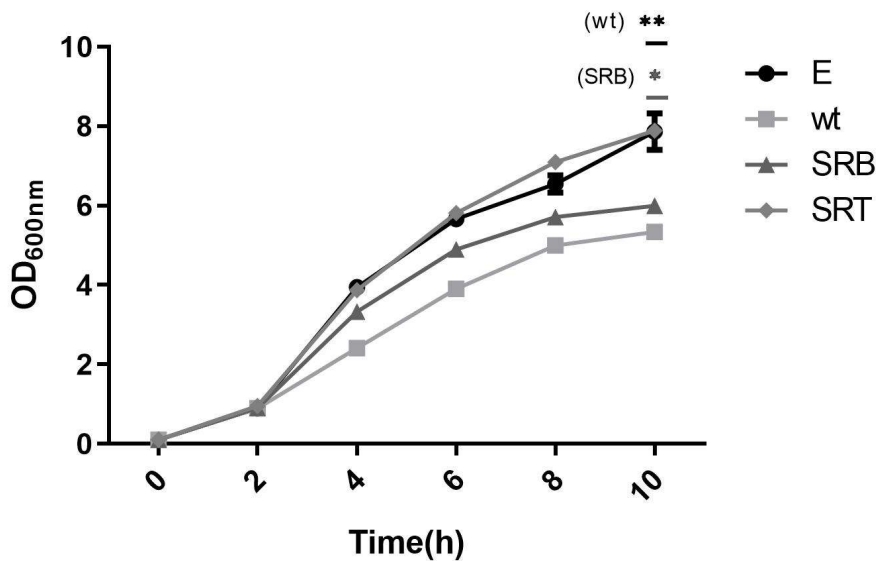

Fig. S2. Growth profiles of  $\Delta stp1$  complemented strains in media in TSB.  $\Delta stp1$  complemented with empty vector  $pTX_{\Delta}$  (E), wild type *stp1* (wt) and mutant *stp1s*

G169S (SRB) and Q31X (SRT). \*; P=0.0157, \*\*; P=0.0055. Student's t test used to analyze the P values using GraphPad prism software. Experiments were repeated at least twice.

**Fig. S3**

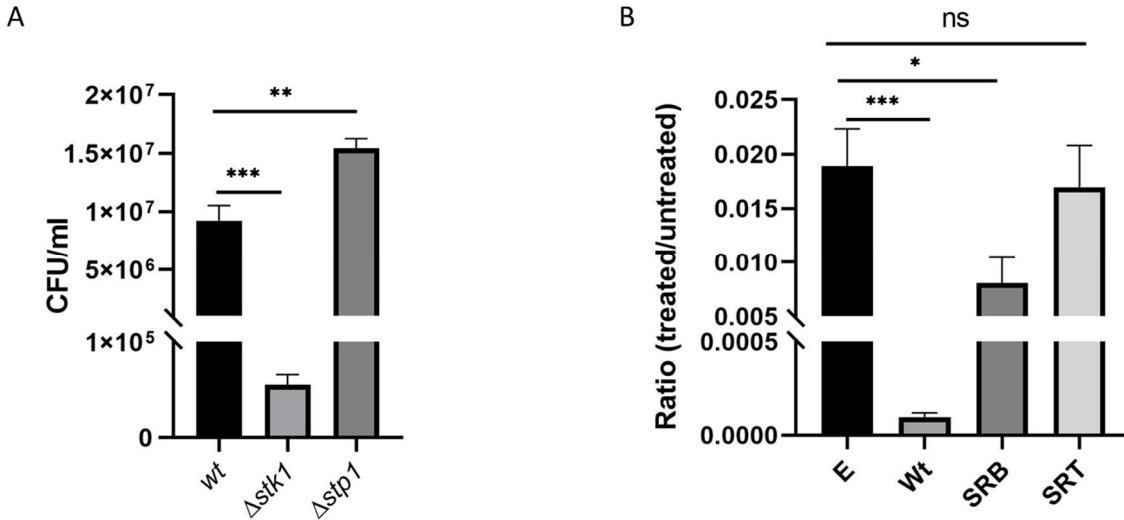

**Fig. S3 Deletion of *stp1* facilitates resistance in SF8300ex.** (A) CFU/ml of knock out strains ( $\Delta stk1$  and  $\Delta stp1$ ) and wild type SF8300ex after 4h of 2 $\mu$ g/ml cefoxitin treatment. (B) Ratio of survival of  $\Delta stp1$  complemented strains after 4h of 2 $\mu$ g/ml cefoxitin treatment.  $\Delta stp1$  complemented with empty vector  $pTX_{\Delta}$  (E), wild type *stp1* (wt) and mutant *stp1*s G169S (SRB) and Q31X (SRT). \*; P=0.01, \*\*; P= 0.0022, \*\*\*; P  $\leq$  0.0007. Student's t test used to analyze the P values using GraphPad prism software. All the experiments were repeated at least twice.

**Fig. S4**

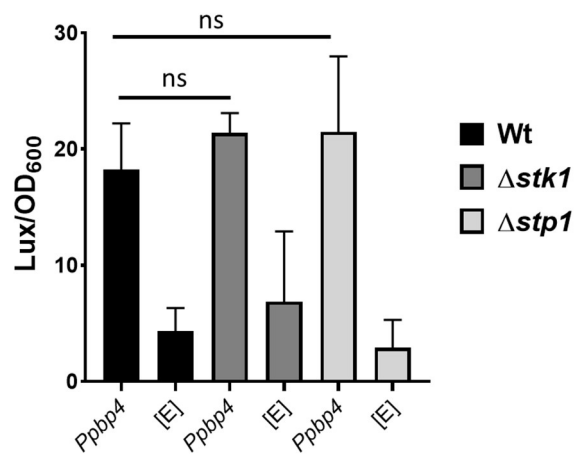

**Fig. S4 *pbp4* expression in  $\Delta stk1$  and  $\Delta stp1$  strains of SF8300ex strain.** *pbp4* promoter from wild type were cloned in to lux reporter plasmid *pAmilux*. The resultant plasmid and its empty vector [E] were transformed into SF8300ex and its  $\Delta stk1$  and  $\Delta stp1$  strains. Lux signals and bacterial OD<sub>600</sub> were measured at 2h post culture and data are presented as lux signal divided by OD<sub>600</sub>. Student's t test used to analyze the *P* values between Wt *Ppbp4* and  $\Delta stk1$  *Ppbp4* and  $\Delta stp1$  *Ppbp4* using GraphPad prism software. Experiments were repeated at least twice.

## References

1. Chatterjee SS, Chen L, Gilbert A, da Costa TM, Nair V, Datta SK, Kreiswirth BN, Chambers HF. 2017. PBP4 Mediates beta-Lactam Resistance by Altered Function. *Antimicrob Agents Chemother* 61.
2. Basuino L, Jouselin A, Alexander JAN, Strynadka NCJ, Pinho MG, Chambers HF, Chatterjee SS. 2018. PBP4 activity and its overexpression are necessary for PBP4-mediated high-level beta-lactam resistance. *J Antimicrob Chemother* 73:1177-1180.
